# Supplementary material for: An optical keypad lock with high resettability based on a quantum dot–porphyrin FRET nanodevice
Source: Royal Society of Chemistry journal article supplement (doi:10.1039/d3na00030c), 2023-01-01
Supplement: d3na00030c1.pdf [file d3na00030c1.pdf]

## Electronic Supplementary Information

### An Optical Keypad Lock with High Resetability Based on A QD-TSPP FRET Nanodevice

Peng Shen,<sup>†a</sup> Yuqian Liu,<sup>†b</sup> Xiaojun Qu,<sup>a</sup> Mingsong Zhu,<sup>a</sup> Ting Huang,<sup>a</sup> and Qingjiang Sun<sup>\*a</sup>

<sup>†</sup>Authors contribute equally.

<sup>a</sup> State Key Laboratory of Bioelectronics, School of Biological Science & Medical Engineering, Southeast University, Nanjing 210096, China

<sup>b</sup> Jiangsu Co-Innovation Center of Efficient Processing and Utilization of Forest Resources and Joint International Research Lab of Lignocellulosic Functional Materials, College of Light Industry and Food Engineering, Nanjing Forestry University, Nanjing 210037, China

Email: sunqj@seu.edu.cn (Qingjiang Sun)

## Supplementary Experimental Section

### Synthesis of APTMS-TSPP

To construct  $\text{bQD@SiO}_2\text{-TSPP}$ , modification of TSPP with 3-(trimethoxysilyl)-1-propanamine (APTMS) according to the reported method.<sup>1</sup> Briefly, 0.05 mmol TSPP and 0.026 mmol  $\text{SOCl}_2$  were added to 60 mL of toluene and refluxed for 8 h in Ar atmosphere. After cooling to ambient temperature, the toluene was removed by rotary evaporation, and the chlorinated TSPP (TSPP-Cl) was moved into the glovebox for further use. The linkage of TSPP and APTMS was performed by adding 0.02 mmol of TSPP-Cl and an excess amount of APTMS (0.05 mmol) in 10 mL of anhydrous DMF. The solution was persistently stirred for 8 h, followed by the removal of DMF and purification of TSPP-APTMS with a silica column. The eluent was  $\text{CHCl}_3\text{:CH}_3\text{OH}$  (20:1), which can effectively separate TSPP-APTMS and other components. The optical properties were characterized for confirming the successful preparations of TSPP-Cl and TSPP-APTMS. For TSPP-Cl, three absorption peaks arise at 550, 596, and 648 nm, and is non-fluorescent. For TSPP-APTMS, the absorption peaks locate at 515, 555, 587, and 633 nm, and the fluorescence peak shows at 721 nm.

### Preparations of $\text{gQD@SiO}_2$ , $\text{bQD@SiO}_2\text{-TSPP}$ and $\text{gQD@SiO}_2/\text{bQD@SiO}_2\text{-TSPP}$ nanodevice

Oil soluble  $\text{gQDs}$  ( $\text{CdSe/ZnS}$ , EM: 517 nm) and  $\text{bQDs}$  ( $\text{Cd}_x\text{Zn}_{1-x}\text{S/ZnS}$ , EM: 424 nm) were synthesized following the reported protocols.<sup>2,3</sup> The  $\text{gQD@SiO}_2$  was prepared by a modified microemulsion method.<sup>4</sup> The positive-charged  $\text{bQD@SiO}_2$  was prepared by ligand exchange with (3-mercaptopropyl)trimethoxysilane (MPTMS), followed by amination with APTMS. The ligand exchange was conducted in the glovebox for preventing the hydrolysis of MPTMS in the presence of water. In detail, 2  $\mu\text{L}$  of MPTMS and 1 mg of  $\text{bQDs}$  were mixed in toluene (1 mL). The oleic acid on surface of  $\text{bQDs}$  was replaced by MPTMS after 4 h of vigorous stirring. The amination was performed by adding 120  $\mu\text{L}$  of APTMS solution (100 mM in toluene) into the MPTMS-modified  $\text{bQDs}$  solution. Hydrolysis of MPTMS and APTMS was initiated by moving the flask to the ambient condition for allowing the entrance of moisture. After 12 h of stirring, the  $\text{bQD@SiO}_2$  was isolated by centrifugation (10000 rpm, 12 min). By mixing TSPP-APTMS with APTMS during the hydrolysis process, the  $\text{bQD@SiO}_2\text{-TSPP}$  was facilely prepared. For optimizing the TSPP density, molar ratio of APTMS and TSPP-APTMS was tuned from 1:0 to 0:1, and the fluorescence quenching degree of  $\text{bQDs}$  was measured. The  $\text{gQD@SiO}_2$  and  $\text{bQD@SiO}_2\text{-TSPP}$  were dispersed in PBS buffer (10 mM, pH 7.0) for further use. The  $\text{gQD@SiO}_2/\text{bQD@SiO}_2\text{-TSPP}$  nanodevice was assembled by dropwise adding 0.5 mL  $\text{gQD@SiO}_2$  solution (0.05  $\mu\text{M}$ ) into 1 mL of  $\text{bQD@SiO}_2\text{-TSPP}$  solution (0.5  $\mu\text{M}$ ). After 10 min of stirring, the nanodevice was precipitated by centrifugation (3000 rpm, 5 min), and was dispersed in 1 mL of PBS buffer.

### Metalation and transmetalation of TSPP

All reagents were dissolved in PBS buffer (10 mM, pH 7.0) for metalation and transmetalation of TSPP. Especially,  $\text{FeSO}_4\cdot 7\text{H}_2\text{O}$  was dissolved in the buffer degassed by  $\text{Ar}_2$ . 1  $\mu\text{M}$  TSPP solution was firstly mixed with 1.5  $\mu\text{M}$   $\text{ZnCl}_2$  solution or 1.5  $\mu\text{M}$   $\text{FeCl}_3$  solution in equal volumes to prepare  $\text{Zn(II)TSPP}$  or  $\text{Fe(III)TSPP}$ , respectively. Under the catalysis of imidazole (60 mM)<sup>5</sup> or  $\text{FeSO}_4\cdot 7\text{H}_2\text{O}$  (1.5  $\mu\text{M}$ ),<sup>6</sup> the standing time for  $\text{Zn(II)TSPP}$  or  $\text{Fe(III)TSPP}$  were 30 min and 60 min, respectively. For the experiment of  $\text{Zn(II)}$  to  $\text{Fe(III)}$  transmetalation of TSPP, 0.5  $\mu\text{M}$  of  $\text{Zn(II)TSPP}$  solution was first mixed with an equal volume of TPEN (4  $\mu\text{M}$ ) solution, after 40 min standing, 10  $\mu\text{M}$   $\text{FeCl}_3$  (containing 1 Equiv. of  $\text{FeSO}_4\cdot 7\text{H}_2\text{O}$ ) was added into the TPEN treated  $\text{Zn(II)TSPP}$ , the incubation time was 60 min. A similar procedure was processed for  $\text{Fe(III)}$  to  $\text{Zn(II)}$  transmetalation, while 4  $\mu\text{M}$  ASC was used as the demetallation reagent of  $\text{Fe(III)TSPP}$  with an incubation time of 30 min. Formation of  $\text{Zn(II)TSPP}$  started with adding 10  $\mu\text{M}$   $\text{ZnCl}_2$  into the mixture under the catalysis of 60 mM imidazole. The transformation of  $\text{Zn(II)TSPP-TSPP-Fe(III)TSPP}$  was monitored by scanning the solet-band (360-450 nm) absorptions of the porphyrins.

### Characterizations

The zeta potential measurements of  $\text{gQD@SiO}_2$ ,  $\text{bQD@SiO}_2\text{-TSPP}$ , as well as the nanodevice, were conducted in PBS buffer (10 mM, pH 7.0) with a Malvern Zetasizer Nano-ZS particle analyzer (Malvern, U.K.). Transmission electron microscopy (TEM) images of the nanoparticles and nanodevice were acquired on a JEOL JEM-2100 instrument (JOEL, Japan). The compositional analysis of powder samples of  $\text{gQD@SiO}_2/\text{bQD@SiO}_2$  and  $\text{gQD@SiO}_2/\text{bQD@SiO}_2\text{-TSPP}$  was performed on a JSM-7600F scanning electron microscopy (SEM, Hitachi, Japan) equipped with energy dispersive X-ray spectroscopy (EDX). The atom concentrations of Si, N, and S were derived from the comparisons with standard samples of  $\text{SiO}_2$ , BN, and  $\text{FeS}_2$ , respectively. Fourier transform-infrared (FT-IR) measurements were conducted with dry samples of  $\text{gQD@SiO}_2$ ,  $\text{bQD@SiO}_2\text{-TSPP}$ , or nanodevice on Nicolet-5700 instrument (Nikon, Japan). The UV-vis absorption spectra of TSPP treated with metal ions or metal chelators were measured with a Hitachi U-4100 spectrophotometer (Hitachi, Japan). All fluorescence measurements were performed on a Hitachi F-4600 fluorescence spectrophotometer (Hitachi,

Japan), with solutions placed in a 0.2 cm quartz cuvette. The excitation wavelength was fixed at 405 nm with a slit width of 5 nm. Fluorescence images of cellular encryption devices were obtained from TCS SP8 confocal fluorescence microscope (Leica, Germany). The excitation wavelength of the laser was 405 nm and emissions were collected at 410 nm–430 nm and 510 nm–530 nm.

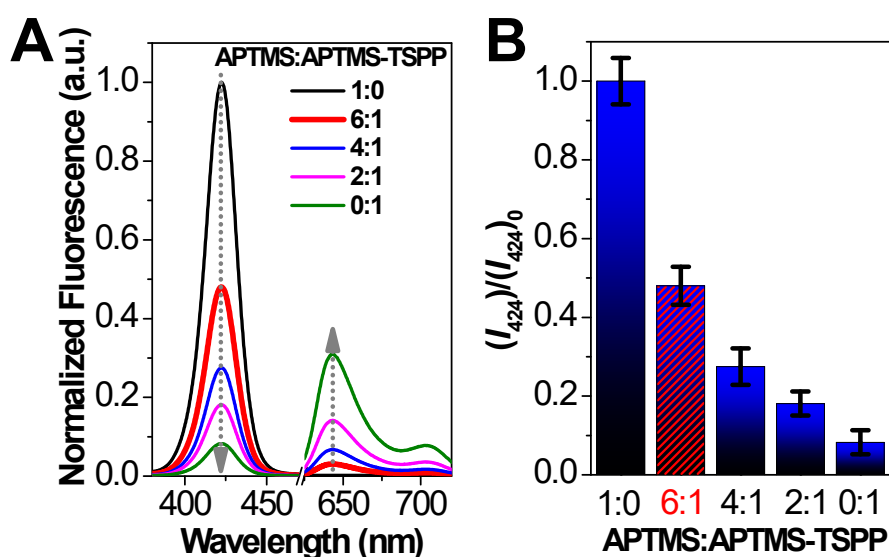

Figure S1. (A) Evolution of the fluorescence spectra, and (B) the relative fluorescence intensity of bQD@SiO<sub>2</sub>-TSPP with varying TSPP densities.

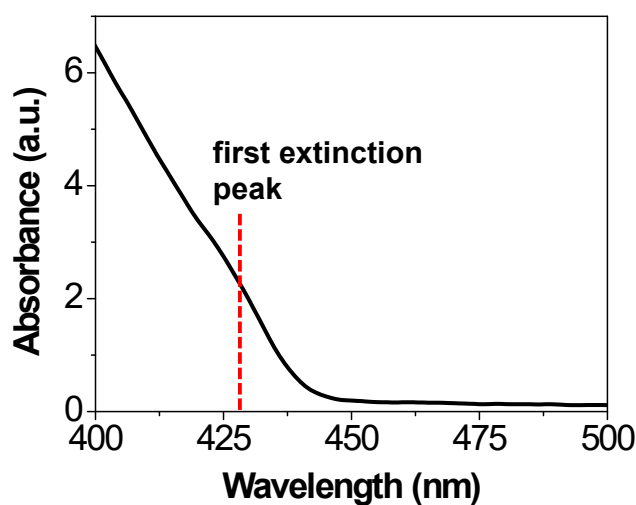

Figure S2. Absorption spectra of bQDs solution (1 mg in 30 mL of chloroform) for estimation of its molar concentration with the Lambert-Beer's law ( $A = \epsilon CL$ ). In the equation,  $A$  represents the absorbance intensity at first extinction peak (428 nm).  $\epsilon$  is the extinction coefficient of QDs with CdSe core, which is calculated to be  $6.17 \times 10^5 \text{ M}^{-1}\text{cm}^{-1}$  according to the equations reported by Peng et al.<sup>7</sup>  $L$  is the path length of the cuvette (1 cm). The calculated concentration and amount of bQDs are  $3.18 \mu\text{M}$  and  $9.54 \times 10^{-8} \text{ mol}$ , respectively. The optimized APTMS-TSPP amount is (molar ratio of APTMS to APTMS-TSPP is 6:1) calculated as  $1.71 \times 10^{-7} \text{ mol}$ . Therefore, the stoichiometry of TSPP to bQDs is determined as averagely 1.8 TSPP molecules are modified on each bQD@SiO<sub>2</sub> particle.

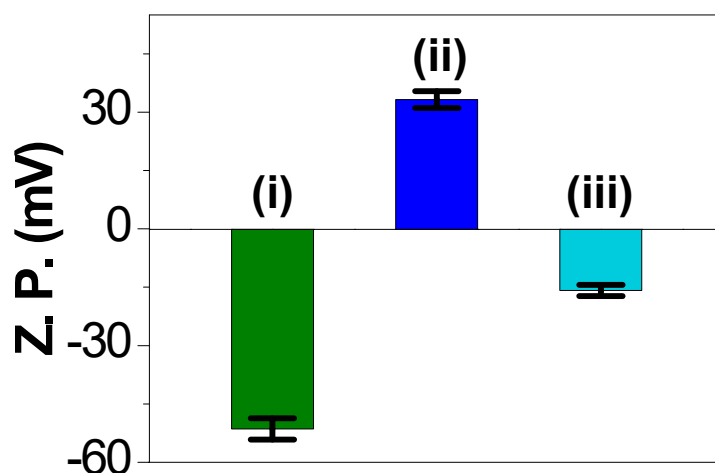

Figure S3. Zeta potentials of (i) gQD@SiO<sub>2</sub>, (ii) bQD@SiO<sub>2</sub>-TSPP and (iii) gQD@SiO<sub>2</sub>/bQD@SiO<sub>2</sub>-TSPP.

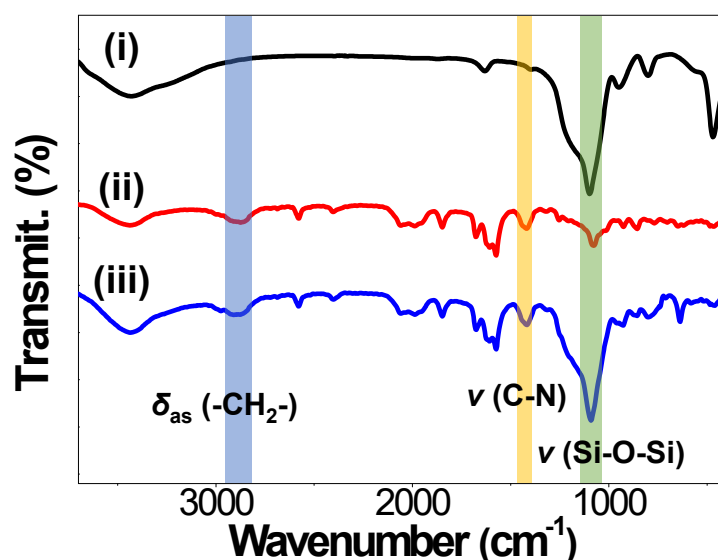

Figure S4. FT-IR spectra of (i) gQD@SiO<sub>2</sub>, (ii) bQD@SiO<sub>2</sub>-TSPP and (iii) gQD@SiO<sub>2</sub>/bQD@SiO<sub>2</sub>-TSPP. Shadows in the figure indicate the deformation vibrations of -CH<sub>2</sub>- linker at 2890 cm<sup>-1</sup> introduced by APTMS (blue shadow), stretching vibration of C-N bond in TSPP (yellow shadow, 1419 cm<sup>-1</sup>), and the stretching vibration of Si-O-Si (green shadow, 1095 cm<sup>-1</sup>) in silica. In comparison with the spectrum of gQD@SiO<sub>2</sub>, emergence of the deformation vibrations of -CH<sub>2</sub>- implies the assembling of bQD@SiO<sub>2</sub>, which is prepared by the use of silane agents with alkane chains (MPTMS and APTMS). Further, the appearance of stretching vibration of C-N bond on the spectrum of gQD@SiO<sub>2</sub>/bQD@SiO<sub>2</sub>-TSPP indicates the successful modification of TSPP, which contains aromatic N-heterocycle.

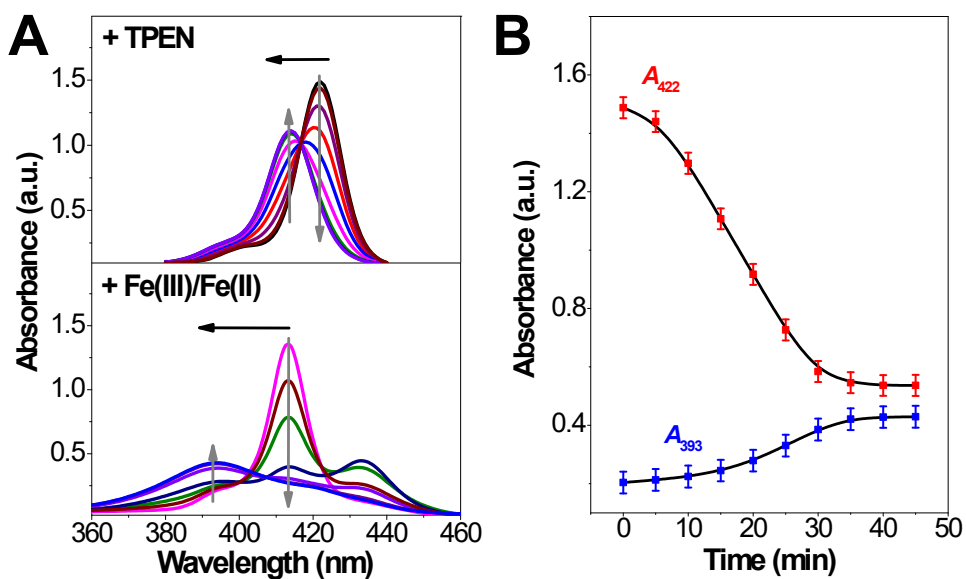

Figure S5. (A) Successive blue-shift of the absorption spectra of TSPP in the Zn(II) to Fe(III) transmetalation process upon treating with TPEN and iron ions. (B) Evolutions of the maximum absorption of Zn(II)TSPP ( $A_{422}$ ) and Fe(III)TSPP ( $A_{393}$ ) with respect to time.

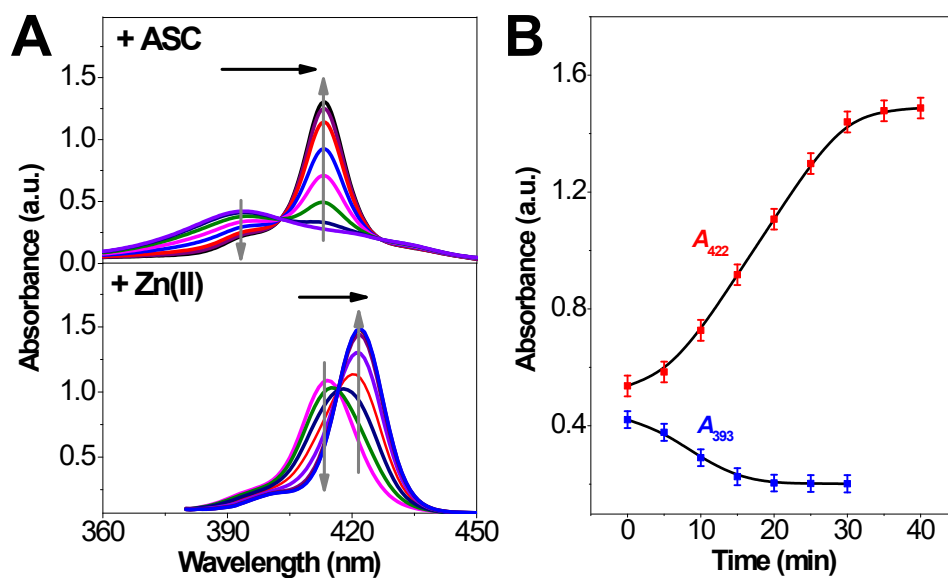

Figure S6. (A) Successive red-shift of the absorption spectra of TSPP in the Fe(III) to Zn(II) transmetalation process upon treating with ASC and Zn(II). (B) Evolutions of the maximum absorption of Zn(II)TSPP ( $A_{422}$ ) and Fe(III)TSPP ( $A_{393}$ ) with respect to time.

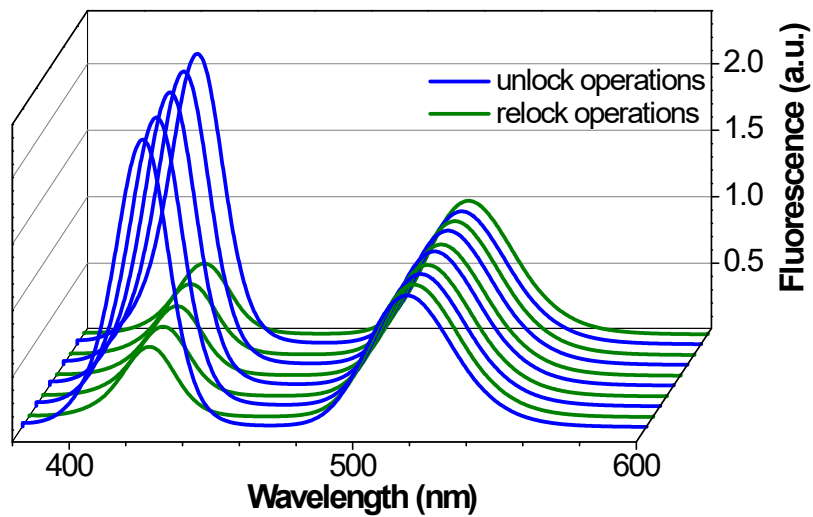

Figure S7. Fluorescence spectra of the nanodevice for 5 repeated unlock and lock operations.

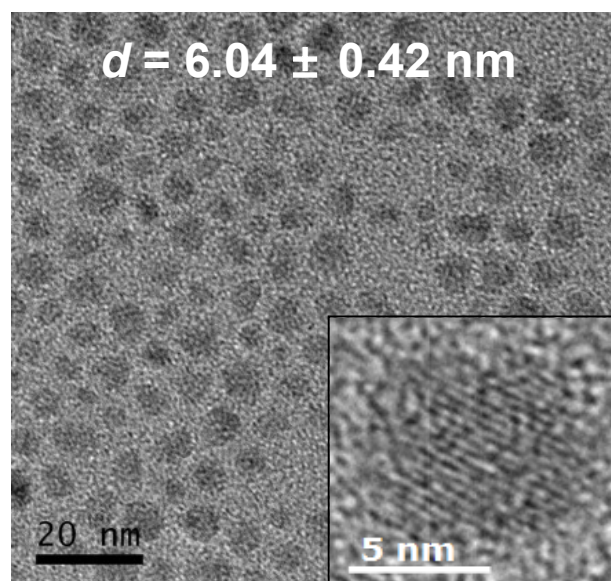

Figure S8. TEM image and high resolution TEM image of bQDs. The average diameter ( $d$ ) is 6.04 nm by counting 50 particles.

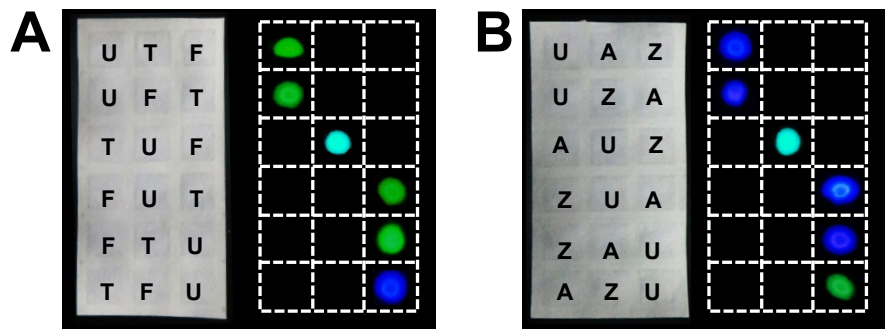

Figure S9. Fluorescent images of the paper keypad lock for varying input combinations in the (A) unlock and (B) lock operations. The images were taken while the UV light was introduced by an UV laser (365 nm).

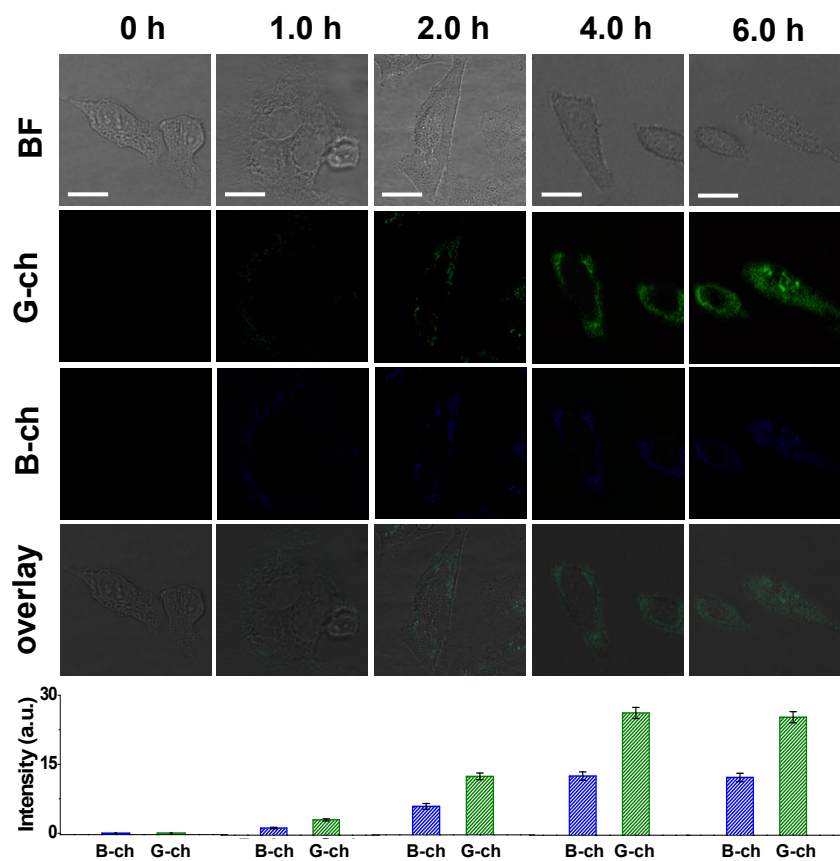

Figure S10. Fluorescent images (green channel and blue channel) of HeLa cells treated with the nanodevice for 0-6 h. Scale bar: 1  $\mu$ m. The histograms represent the fluorescence intensities of green and blue channels of the cytoplasm, which are calculated with ImageJ.



## Supporting references

1. S. Farhadi, A. Zabardasti and M. H. Rahmati, *J. Chem. Res.*, 2011, **3**, 157–160.
2. W. K. Bae, K. Char, H. Hur and S. Lee, *Chem. Mater.*, 2008, **20**, 531–539.
3. K. H. Lee, J. H. Lee, W. S. Song, H. Ko, C. Lee, J. H. Lee and H. Yang, *ACS Nano*, 2013, **7**, 7295–7302.
4. T. Aubert, S. J. Soenen, D. Wassmuth, M. Cirillo, R. Van Deun, K. Braeckmans and Z. Hens, *ACS Appl. Mater. Interfaces*, 2014, **6**, 11714–11723.
5. H. Ishii and H. Tsuchiai, *Anal. Sci.*, 1987, **3**, 229–233.
6. R. Huszank, G. Lendvay and O. Horvath, *J. Biol. Inorg. Chem.*, 2007, **12**, 681–690.
7. W. W. Yu, L. Qu, W. Guo, and X. G. Peng, *Chem. Mater.*, 2003, **15**, 2854–2860.
